# Supplementary material
Source: MDPI journal article supplement (https://www.mdpi.com/2071-1050/11/6/1732)
Supplement: s1 [file s1 › Figure S2.pdf]

**Figure S2.** Proportional distribution of soil organic carbon storage (CS) at the soil layers (0-5 and 5-20 cm) with shrub encroachment.

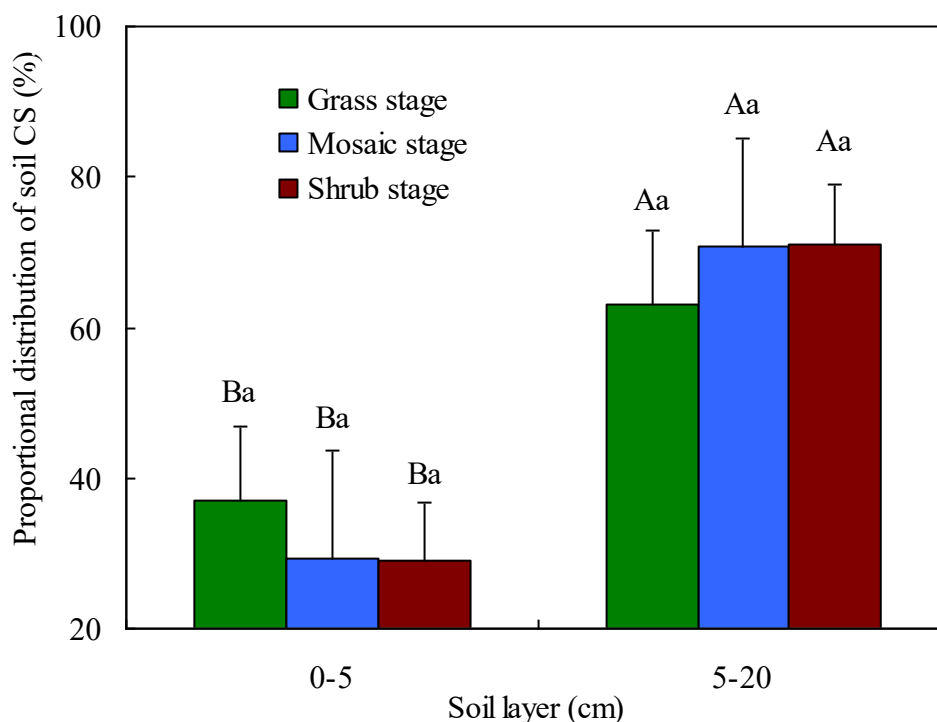

Different capital letters within a same succession indicate significant differences ( $p < 0.05$ ), but same lowercase letter within a same soil layer indicates no significant differences ( $p > 0.05$ ). This figure showed the higher proportion of soil organic carbon storage (CS) in the deep soil layer than in the shallow soil layer, and the proportion of soil organic carbon storage (CS) in the deep soil layer had the increased trend.
